# Supplementary material for: Increasing global agricultural production by reducing ozone damages via methane emission controls and ozone-resistant cultivar selection
Source: PubMed Central journal article supplement (PMC3627305; doi:10.1111/gcb.12118), 2013-02-05

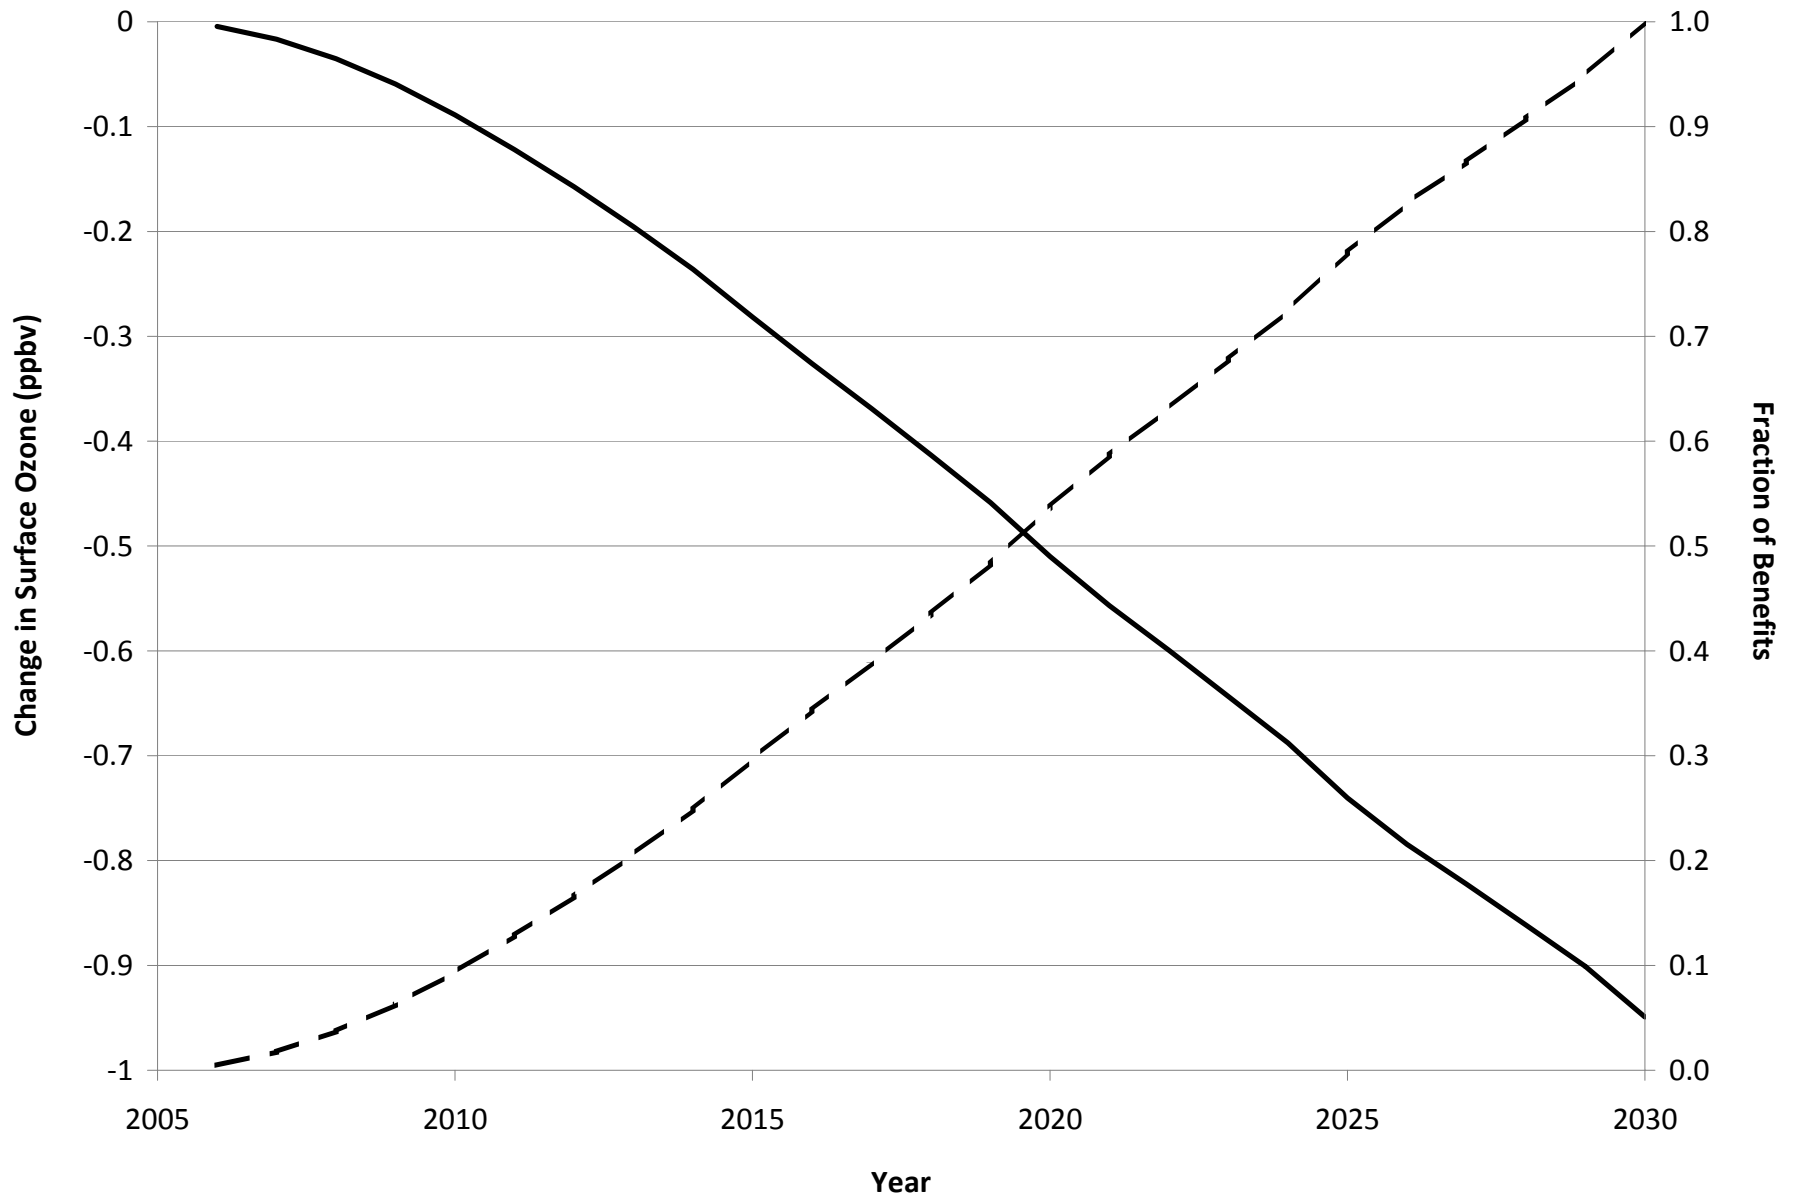

Supplement: gcb0019-1285-SD3.pdf [file gcb0019-1285-SD3.pdf]
