# Supplementary material for: Increasing global agricultural production by reducing ozone damages via methane emission controls and ozone-resistant cultivar selection
Source: PubMed Central journal article supplement (PMC3627305; doi:10.1111/gcb.12118), 2013-02-05
Supplement: gcb0019-1285-SD5.pdf [file gcb0019-1285-SD5.pdf]

Crop Production Gain

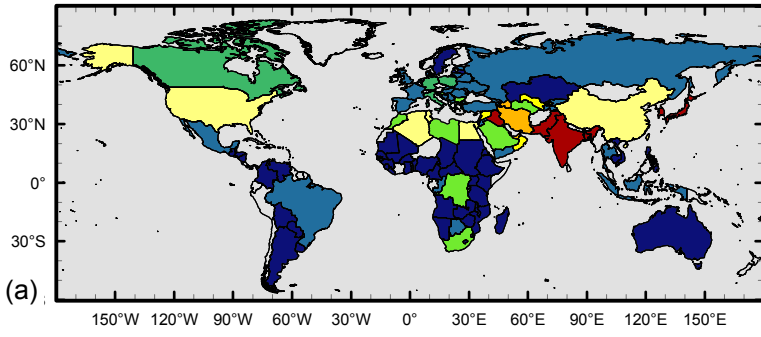

Crop Production Gain (% from 2000)

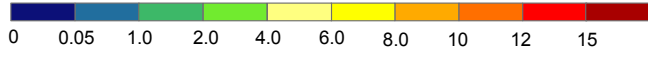

Economic Gain

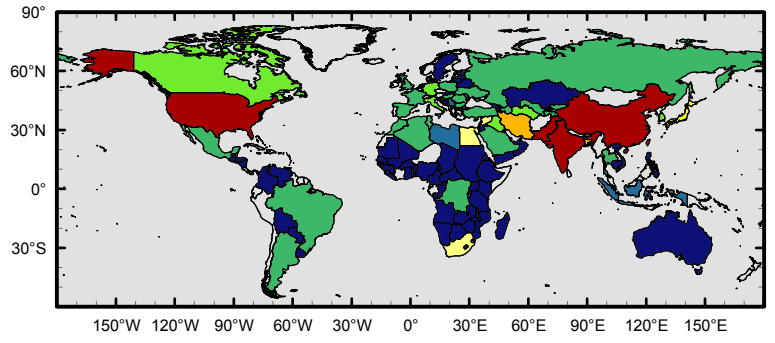

Economic Gain (Million USD<sub>2000</sub>)

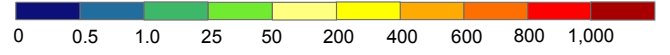

(a)
