# Supplementary material for: Increasing global agricultural production by reducing ozone damages via methane emission controls and ozone-resistant cultivar selection
Source: PubMed Central journal article supplement (PMC3627305; doi:10.1111/gcb.12118), 2013-02-05
Supplement: gcb0019-1285-SD8.pdf [file gcb0019-1285-SD8.pdf]

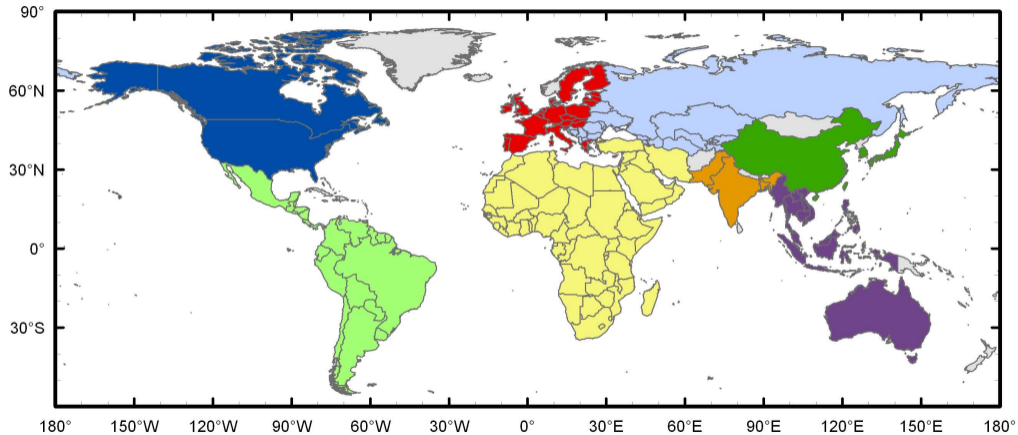

## Region Names

-  Africa & the Middle East
-  ASEAN & Australia
-  East Asia
-  EU-25
-  Former USSR & non-EU eastern Europe
-  Latin America
-  North America
-  South Asia
-  Countries not included in regional definitions
